# Supplementary material
Source: publisher site journal article supplement (https://www.dovepress.com/article/566873)

**Figure S1**. XRD pattern of MIL-101(Fe).

**

**

**Figure S2.** TGA curve of MIL-101(Fe).

**
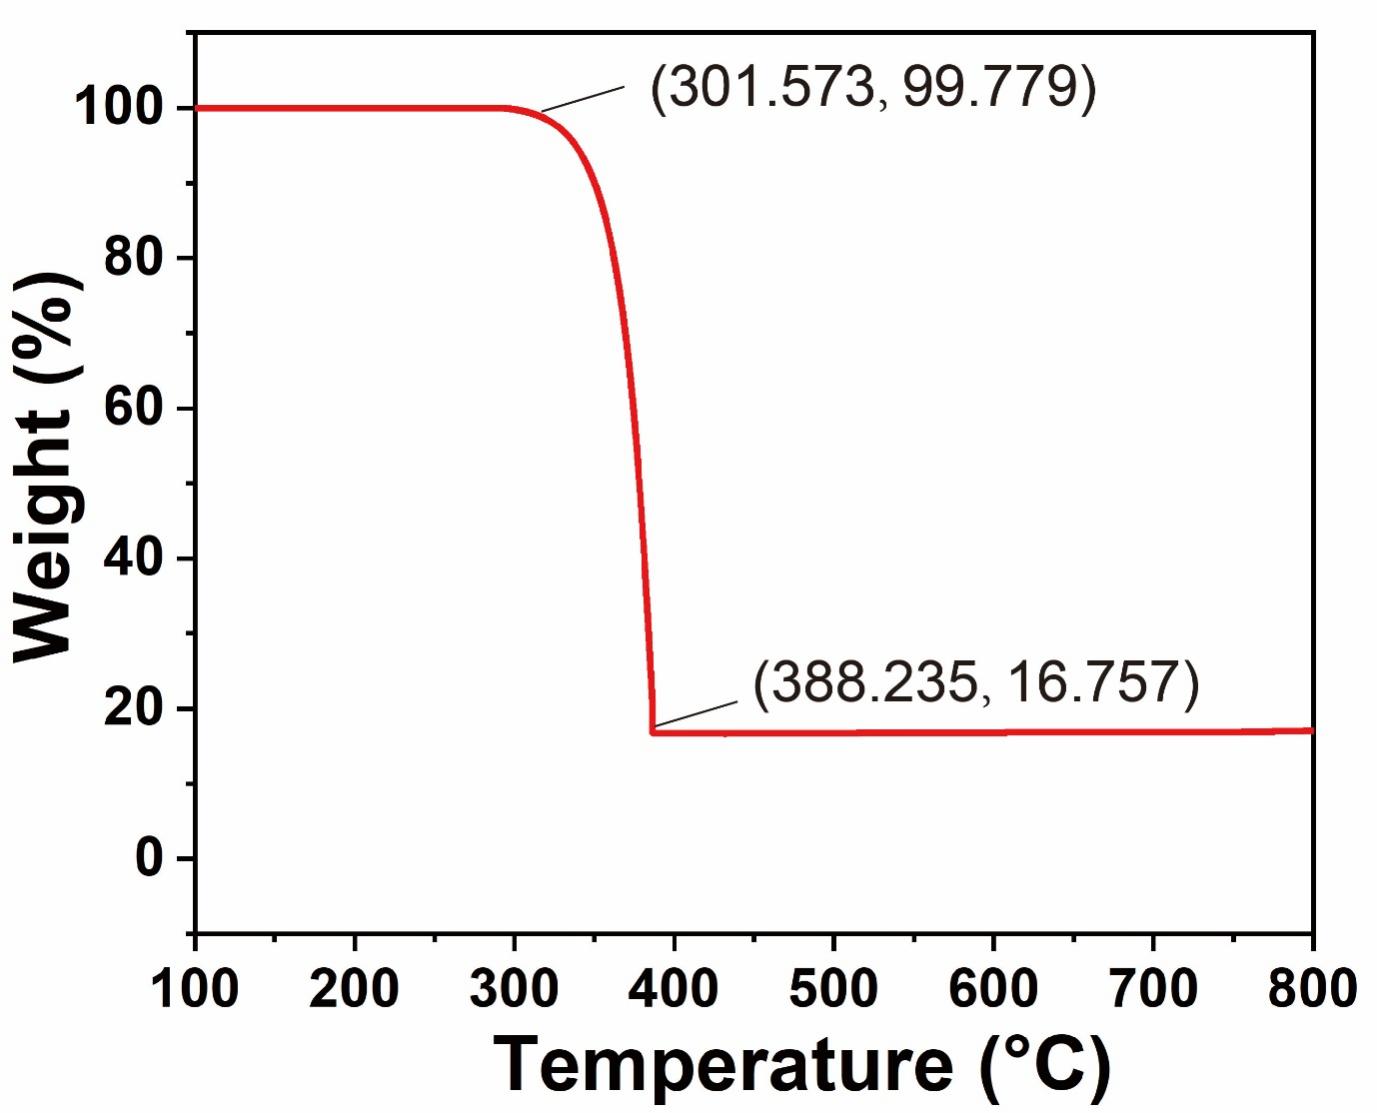
**

**Figure S3.** Raman spectrum of MIL-101(Fe).


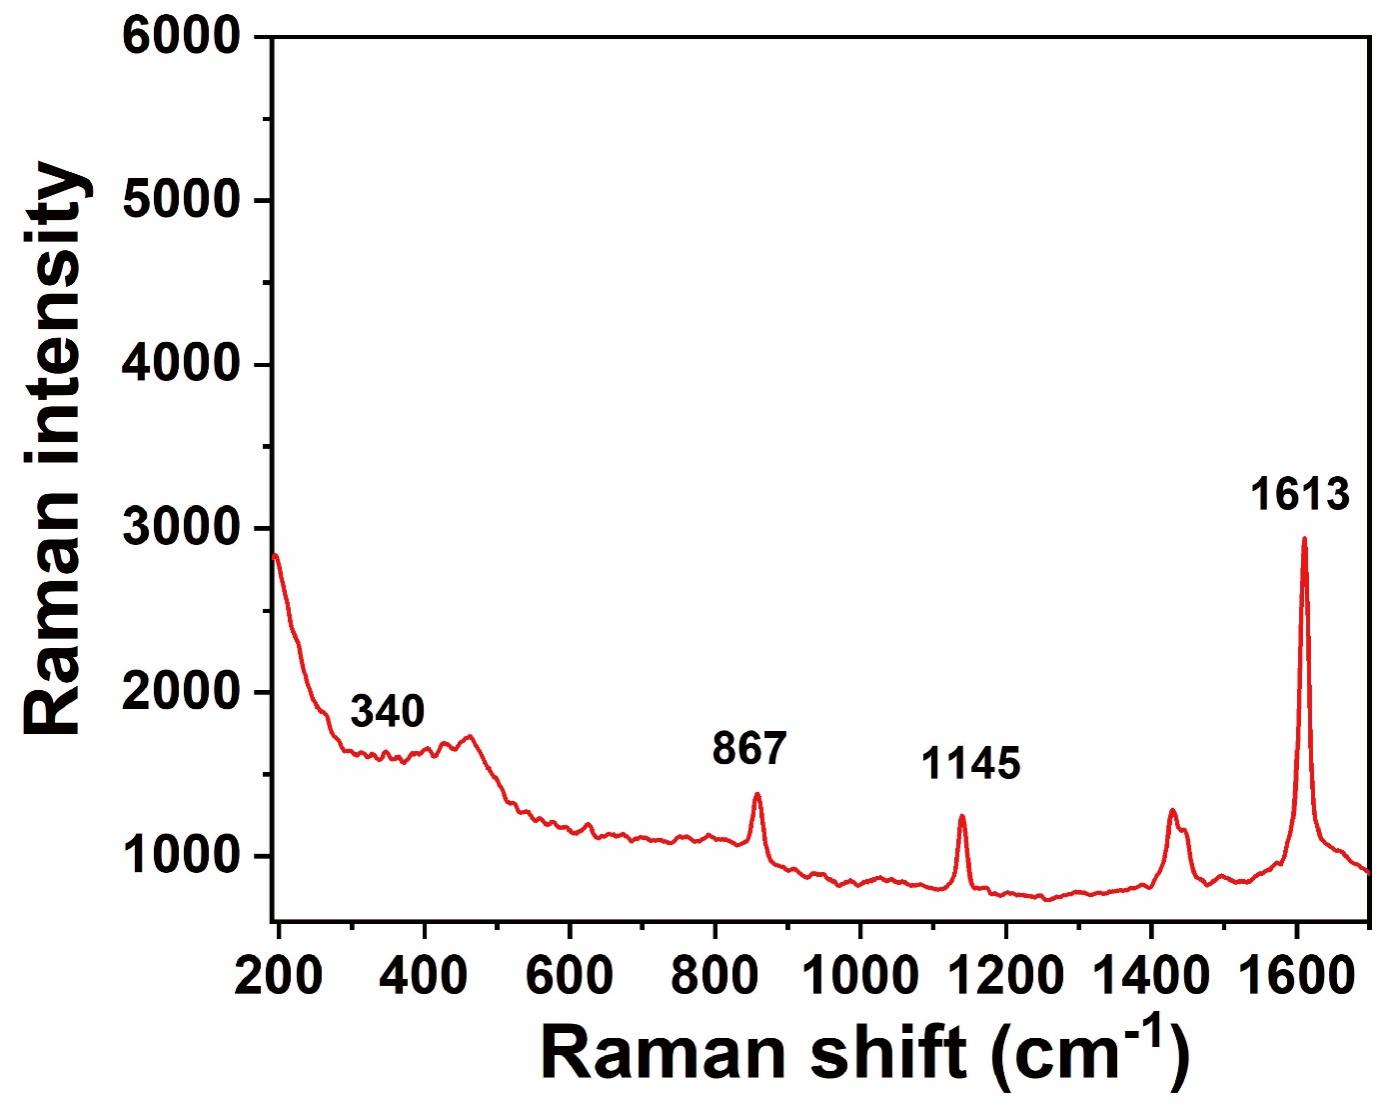

Supplement: Supplementary file 1 [file 566873_Supplementary%20Figures%20S1-S3.docx]
